# Supplementary material
Source: PubMed Central journal article supplement (PMC9389637)
Supplement: bloodBLD2021015328-suppl2.pdf [file bloodBLD2021015328-suppl2.pdf]

## Supplemental appendix

### Prognostic impact of *DDX41* germline mutations in intensively treated acute myeloid leukemia patients: an ALFA-FILO study

Nicolas Duployez\*, Laëtitia Largeaud\*, Matthieu Duchmann\* et al

|                                                                                                                                            |           |
|--------------------------------------------------------------------------------------------------------------------------------------------|-----------|
| <b>Abbreviations</b> .....                                                                                                                 | <b>2</b>  |
| <b>Supplemental material: patient's eligibility criteria</b> .....                                                                         | <b>2</b>  |
| ALFA0701 (NCT00927498):.....                                                                                                               | 2         |
| ALFA0702 (NCT00932412):.....                                                                                                               | 2         |
| ALFA1200 (NCT01966497):.....                                                                                                               | 3         |
| ALFA1401 (NCT02473146):.....                                                                                                               | 3         |
| LAM-SA 2007 (NCT00590837): .....                                                                                                           | 3         |
| <b>Supplemental material: 67-gene panel</b> .....                                                                                          | <b>4</b>  |
| <b>Supplemental table 1. Application of the ACMG/AMP guidelines for <i>DDX41</i> variants interpretation</b> .....                         | <b>5</b>  |
| <b>Supplemental table 2. <i>DDX41</i> variants retained as Causal in the Clinical trial cohort</b> .....                                   | <b>5</b>  |
| <b>Supplemental table 3. <i>DDX41</i> variants retained as VUS in the Clinical trial cohort</b> . 5                                        |           |
| <b>Supplemental table 4. Interpretation of <i>DDX41</i> variants in the Real-life cohort</b> .....                                         | <b>5</b>  |
| <b>Supplemental table 5. Bivariate analysis for response to induction</b> . ....                                                           | <b>5</b>  |
| <b>Supplemental table 6. Multivariate analysis for response to induction</b> . ....                                                        | <b>5</b>  |
| <b>Supplemental table 7. Multivariate RMST analyses</b> .....                                                                              | <b>5</b>  |
| <b>Supplemental Table 8. Subgroup RMST analyses</b> . ....                                                                                 | <b>5</b>  |
| <b>Supplemental table 9. Characteristics of patients achieving HSCT in first CR</b> .....                                                  | <b>5</b>  |
| <b>Supplemental table 10. AML with recurrent genetic abnormalities and <i>DDX41</i><sup>MutGL</sup> mutations</b> . ....                   | <b>5</b>  |
| <b>Supplemental figure 1: Interpretation of <i>DDX41</i> variants in the CT cohort</b> .....                                               | <b>6</b>  |
| <b>Supplemental figure 2: Genetic characteristics of <i>DDX41</i><sup>MutGL</sup> AML</b> .....                                            | <b>7</b>  |
| <b>Supplemental figure 3: Outcome of patients with <i>DDX41</i><sup>MutGL</sup> compared to <i>DDX41</i><sup>WT</sup> AML</b> .....        | <b>8</b>  |
| <b>Supplemental figure 4: Scaled Schoenfeld residuals plot versus time for the Cox proportional hazards model</b> .....                    | <b>9</b>  |
| <b>Supplemental figure 5: Fishplots visualizing patterns of clonal evolution in relapse patients as inferred by CALDER algorithm</b> ..... | <b>10</b> |
| <b>References</b> .....                                                                                                                    | <b>11</b> |

## Abbreviations

AML: acute myeloid leukemia

APL: acute promyelocytic leukemia

CBF: core binding factor

CR: complete remission

CRi: complete remission with incomplete recovery

CRp: complete remission with incomplete platelet recovery

HDAC: high-dose cytarabine

HSCT: hematopoietic stem cell transplantation

IDAC: intermediate-dose cytarabine

GO: gemtuzumab ozogamicin

## Supplemental material: patient's eligibility criteria

### **ALFA0701 (NCT00927498):**

- **Enrollment:** between January 2008 and November 2010.
- **Eligibility criteria:** patients aged 50 to 70 years-old with a previously untreated diagnosis of *de novo* AML (except APL).
- **Induction course:** patients were randomized to receive a “3+7” induction course with daunorubicin (60 mg/m<sup>2</sup>/d on days 1 to 3) and cytarabine (200 mg/m<sup>2</sup>/d on days 1-7) without (control group) or with GO (3 mg/m<sup>2</sup>/d on days 1, 4 and 7).
- **Post remission therapy:** patients in CR/CRp received two consolidation courses of daunorubicin (60 mg/m<sup>2</sup> for 1 day [first course] or 2 days [second course]) in combination with cytarabine (1 g/m<sup>2</sup>/12 h on days 1–4), with or without GO (3 mg/m<sup>2</sup> on day 1).
- Patients with > 10% bone marrow blasts at day 15 could receive a second induction course was given with daunorubicin (60 mg/m<sup>2</sup>/d for 2 days) and cytarabine (1 g/m<sup>2</sup>/12 h for 3 days) without GO.
- **HSCT eligibility:** patients in CR/CRp with intermediate- or adverse-risk AML according to the ELN-2010 classification were eligible for allogeneic HSCT if they had a compatible sibling or a 10/10 HLA-matched unrelated donor.

### **ALFA0702 (NCT00932412):**

- **Enrollment:** between March 2009 and September 2013.
- **Eligibility criteria:** patients aged 18 to 59 years-old with a previously untreated diagnosis of *de novo* AML (except APL and CBF AML).
- **Induction course:** all patients received timed sequential induction chemotherapy with daunorubicin (60 mg/m<sup>2</sup>/d on days 1 to 3 and 35 mg/m<sup>2</sup>/d on days 8 and 9) and cytarabine (500 mg/m<sup>2</sup>/d on days 1 to 3 and 1 g/m<sup>2</sup>/12h on days 8 to 10).
- **Post remission therapy:** patients achieving CR/CRp with favorable-risk AML (*CEBPA* or *NPM1* mutation without *FLT3*-ITD) were planned to receive three HDAC courses. Patients with intermediate- or unfavorable-risk AML who were not eligible to HSCT were randomly assigned to either HDAC courses (3 g/m<sup>2</sup>/12h on days 1, 3, and 5) or CLARA (clofarabine 30 mg/m<sup>2</sup>/d on days 2 to 6 and cytarabine 1 g/m<sup>2</sup>/d on days 1 to 5) consolidation cycles.
- **HSCT eligibility:** patients in CR/CRp with intermediate- or unfavorable-risk AML were eligible for allogeneic HSCT if they had a compatible sibling or a 10/10 HLA-matched

unrelated donor. Additionally, patients randomly assigned for HDAC/CLARA post-remission therapy with a late donor identification could receive HSCT in both arms.

**ALFA1200 (NCT01966497):**

- **Enrollment:** between September 2012 and June 2016.
- **Eligibility criteria:** patients aged 60 years or older with a previously untreated diagnosis of AML (except APL or AML evolving from myeloproliferative neoplasms).
- **Induction course:** all patients received a “3+7” induction course with idarubicin (12 mg/m<sup>2</sup>/d on days 1-3) and cytarabine (200 mg/m<sup>2</sup>/d on days 1-7).
- **Post remission therapy:** patients achieving CR/CRp received 2 IDAC courses (1.5 g/m<sup>2</sup>/12h on days 1, 3, and 5; reduced to 1 g/m<sup>2</sup>/12h for patients aged 70 years or older).
- Patients not achieving CR/CRp could receive the first IDAC course as a salvage therapy.
- **HSCT eligibility:** patients in CR/CRp with intermediate- or adverse-risk AML according to the ELN-2010 classification were eligible for allogeneic HSCT if they had a compatible sibling or a 9-10/10 HLA-matched unrelated donor.

**ALFA1401 (NCT02473146):**

- **Enrollment:** between January 2016 and March 2019.
- **Eligibility criteria:** patients aged 60 years or older with a previously untreated diagnosis of *de novo* AML (except APL) and a favorable or intermediate cytogenetic risk.
- **Induction course:** patients were randomized to receive an experimental GO-cytarabine combination or a standard anthracycline-cytarabine treatment. The standard arm consisted in a “3+7” induction course with idarubicin (12 mg/m<sup>2</sup>/d on days 1-3) and cytarabine (200 mg/m<sup>2</sup>/d on days 1-7). The GO arm consisted of two doses of GO (3 mg/m<sup>2</sup>/d on days 1 and 4) and cytarabine (200 mg/m<sup>2</sup>/d on days 1-7).
- **Post-remission therapy:** patients achieving CR/CRp/CRi received two courses of IDAC (1.5 g/m<sup>2</sup>/12h on days 1, 3 and 5). In the GO arm, a third dose of GO (3 mg/m<sup>2</sup>/d) was administered on day 1 of the first IDAC course.
- Patients not achieving CR/CRp/CRi could receive the first IDAC course as a salvage therapy.
- **HSCT eligibility:** the decision to perform allogeneic HSCT in first remission was left to the discretion of the physician.

**LAM-SA 2007 (NCT00590837):**

- **Enrollment:** between February 2008 and December 2011.
- **Eligibility criteria:** patients aged 60 years or older with a previously untreated diagnosis of *de novo* AML (except APL and isolated granulocytic sarcoma) and a favorable or intermediate cytogenetic risk. Patients who had previous chemotherapy or radiotherapy for another cancer were allowed.
- **Induction course:** patients were randomized to receive therapy with or without lomustine. Induction therapy consisted of idarubicin (8 mg/m<sup>2</sup>/d on days 1 to 5) and cytarabine (100 mg/m<sup>2</sup>/d on days 1 to 7) with or without lomustine (200 mg/m<sup>2</sup> on day 1).
- **Post-remission therapy:** patients achieving CR/CRi received a first consolidation with idarubicin (8 mg/m<sup>2</sup>/d on days 1 to 3) and cytarabine (50 mg/m<sup>2</sup>/12h on days 1 to 5) with or without lomustine (80 mg on day 1). In patients who were not eligible to HSCT, this was followed by 6 reinduction courses with reduced doses of idarubicin (8 mg/m<sup>2</sup> on day

1) and cytarabine (50 mg/m<sup>2</sup>/12h on days 1 to 5) with or without lomustine (40 mg on day 1).

- Patients not achieving CR/CRi were not allowed to receive a second induction course and were treated at the discretion of local investigators.
- **HSCT eligibility:** patients in CR/CRi without a favorable molecular profile (according to *NPM1* and *FLT3*-ITD) were eligible for allogeneic HSCT if they had a compatible sibling or a 10/10 HLA-matched unrelated donor.

#### **Supplemental material: 67-gene panel**

Complete coding regions except otherwise stated: *ANKRD26* (5'UTR), *ASXL1* (e11-e12), *ASXL2* (e11-e12), *ATRX*, *BCOR*, *BCORL1*, *BRAF* (e11,e15), *CALR* (e09), *CBL* (e08-e09), *CEBPA*, *CRLF2* (e06), *CSF3R* (e14-e17), *CUX1*, *DDX41*, *DNMT3A*, *ETNK1*, *ETV6*, *EZH2*, *FLT3*, *GATA1* (e02-e03), *GATA2*, *GNAS* (e08-e09), *GNB1* (e05-e06), *HRAS* (e02-e04), *IDH1*, *IDH2*, *IKZF1*, *IL2RG* (e08), *IL7R* (e06), *JAK1*, *JAK2*, *JAK3*, *KDM6A*, *KIT* (e08-e11,e17), *KRAS* (e02-e04), *MPL*, *NF1*, *NFE2*, *NPM1* (e10-e11), *NRAS* (e02-e04), *PAX5*, *PHF6*, *PPM1D*, *PTPN11*, *RAD21*, *RIT1* (e05), *RUNX1*, *SAMD9*, *SAMD9L*, *SETBP1*, *SF3B1* (e13-e16), *SH2B3*, *SMC1A*, *SMC3*, *SRP72*, *SRSF2* (e01), *STAG2*, *STAT3*, *STAT5B*, *TERC*, *TERT*, *TET2*, *TP53*, *U2AF1* (e02,e06), *UBA1* (e03), *WT1* and *ZRSR2*.

**Supplemental table 1. Application of the ACMG/AMP guidelines for *DDX41* variants interpretation.**

See additional file.

**Supplemental table 2. *DDX41* variants retained as Causal in the Clinical trial cohort.**

See additional file.

**Supplemental table 3. *DDX41* variants retained as VUS in the Clinical trial cohort.**

See additional file.

**Supplemental table 4. Interpretation of *DDX41* variants in the Real-life cohort.**

See additional file.

**Supplemental table 5. Bivariate analysis for response to induction.**

See additional file.

**Supplemental table 6. Multivariate analysis for response to induction.**

See additional file.

**Supplemental table 7. Multivariate RMST analyses.**

See additional file.

**Supplemental Table 8. Subgroup RMST analyses.**

See additional file.

**Supplemental table 9. Characteristics of patients achieving HSCT in first CR.**

See additional file.

**Supplemental table 10. AML with recurrent genetic abnormalities and *DDX41*<sup>MutGL</sup> mutations.**

See additional file.

**Supplemental figure 1: Interpretation of *DDX41* variants in the CT cohort.**

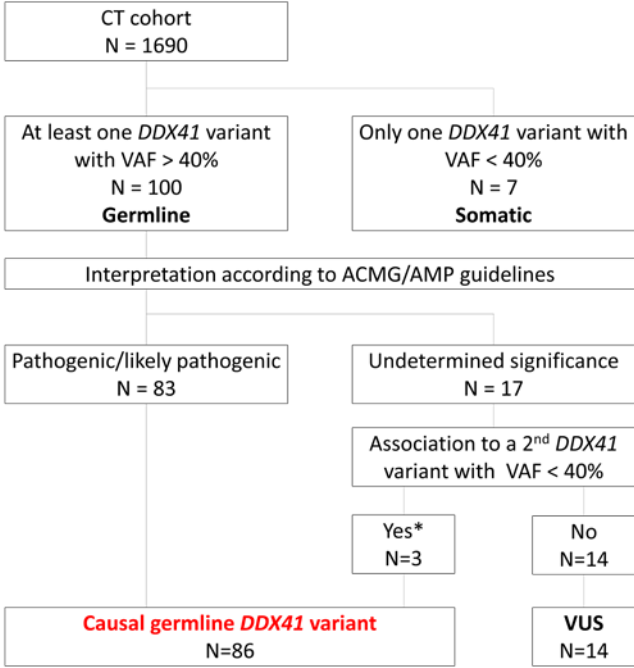

\* All 3 patients harbored the same *DDX41* p.G173R variant

## Supplemental figure 2: Genetic characteristics of *DDX41*<sup>MutGL</sup> AML.

(A) Frequency of the most frequent germline *DDX41* variants between younger (< 60y) and older (≥ 60y) patients. (B) Molecular landscape of the 191 *DDX41*<sup>MutGL</sup> AML at diagnosis. (C) Volcano plot representing the association between *DDX41*<sup>MutGL</sup> variants and biological and mutational covariates (estimate of the point-biserial correlation [continuous variables] or F [dichotomous variables] on the x-axis) and the significance of the difference, expressed on an inverted logarithmic scale on the y-axis. The P values were calculated using the Mann-Whitney U test (continuous variables) or Fisher's exact (dichotomous) test. The size of the circle corresponds to the frequency of the variable in the cohort. For statistical power consideration we used only variables with frequency > 1% in the whole cohort (i.e. > 15 patients).

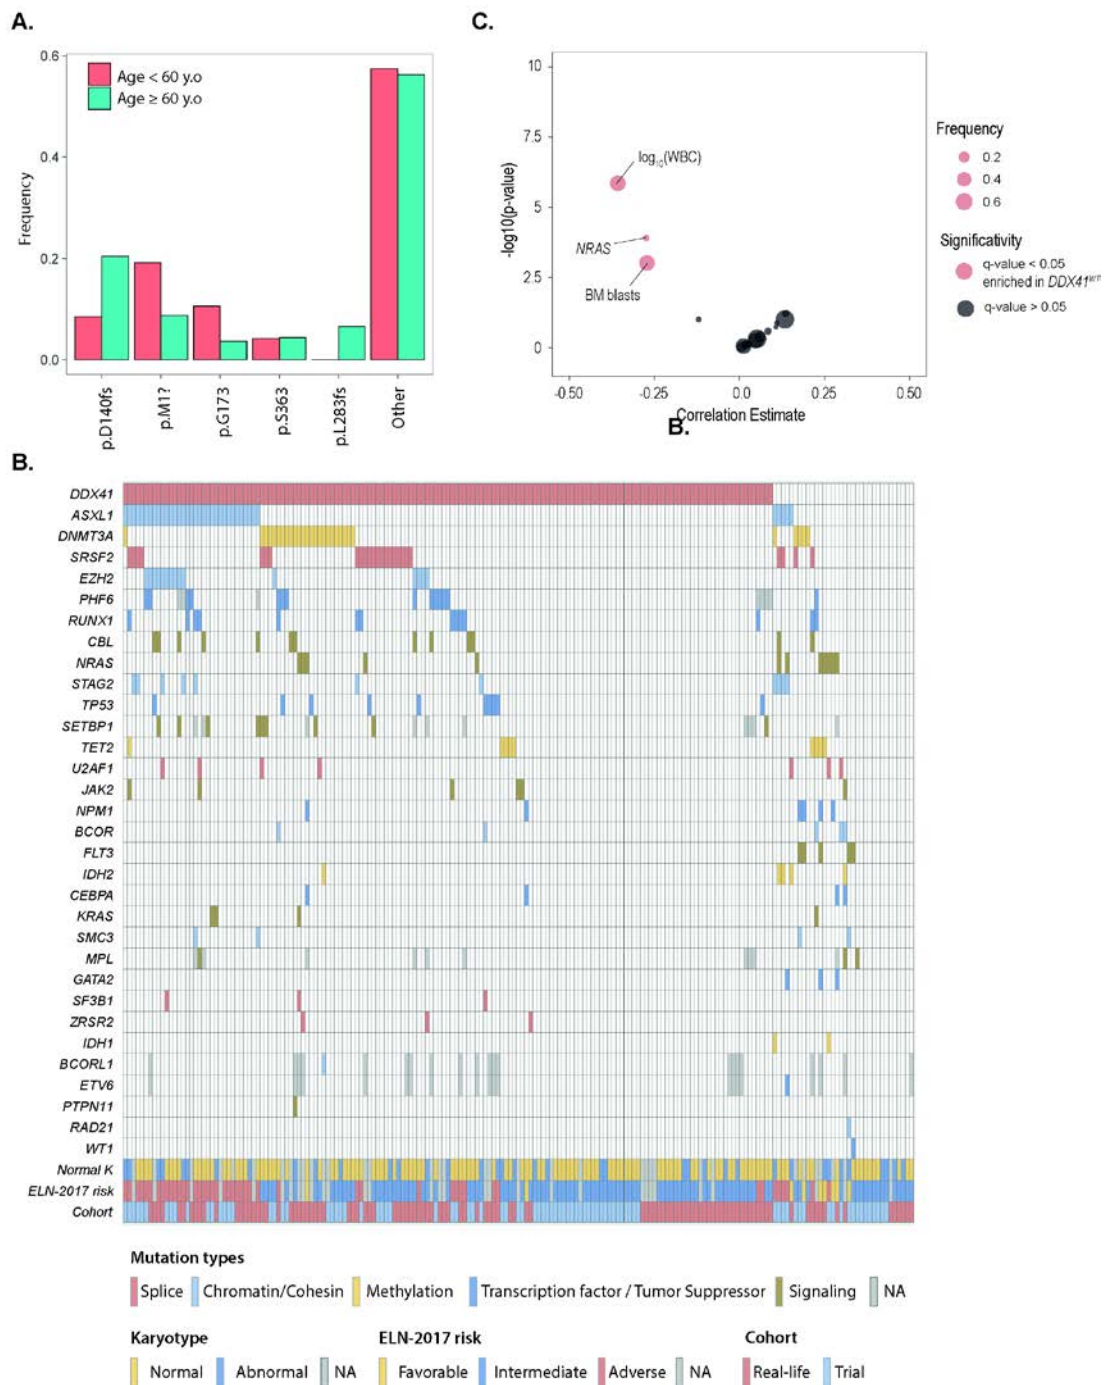

**Supplemental figure 3: Outcome of patients with  $DDX41^{MutGL}$  compared to  $DDX41^{WT}$  AML.**

(A) CR/CRp rates after one induction course in  $DDX41^{MutGL}$  compared to  $DDX41^{WT}$  (Fav, Int/Adv) AML patients according to the trial. P-values from the bivariate regression for response are reported. Error bars represent the 95% confidence intervals calculated with the exact method. (B) OS censored at HSCT in CR1 in patients with  $DDX41^{MutGL}$  and  $DDX41^{WT}$  according to the ELN-2017 classification. (C) OS and (D) DFS censored at HSCT in CR1 in patients with  $DDX41^{MutGL}$  (yellow) versus  $DDX41^{WT}$  ELN-2017 favorable (blue) and  $DDX41^{WT}$  ELN-2017 intermediate/adverse (grey) according to the trial.

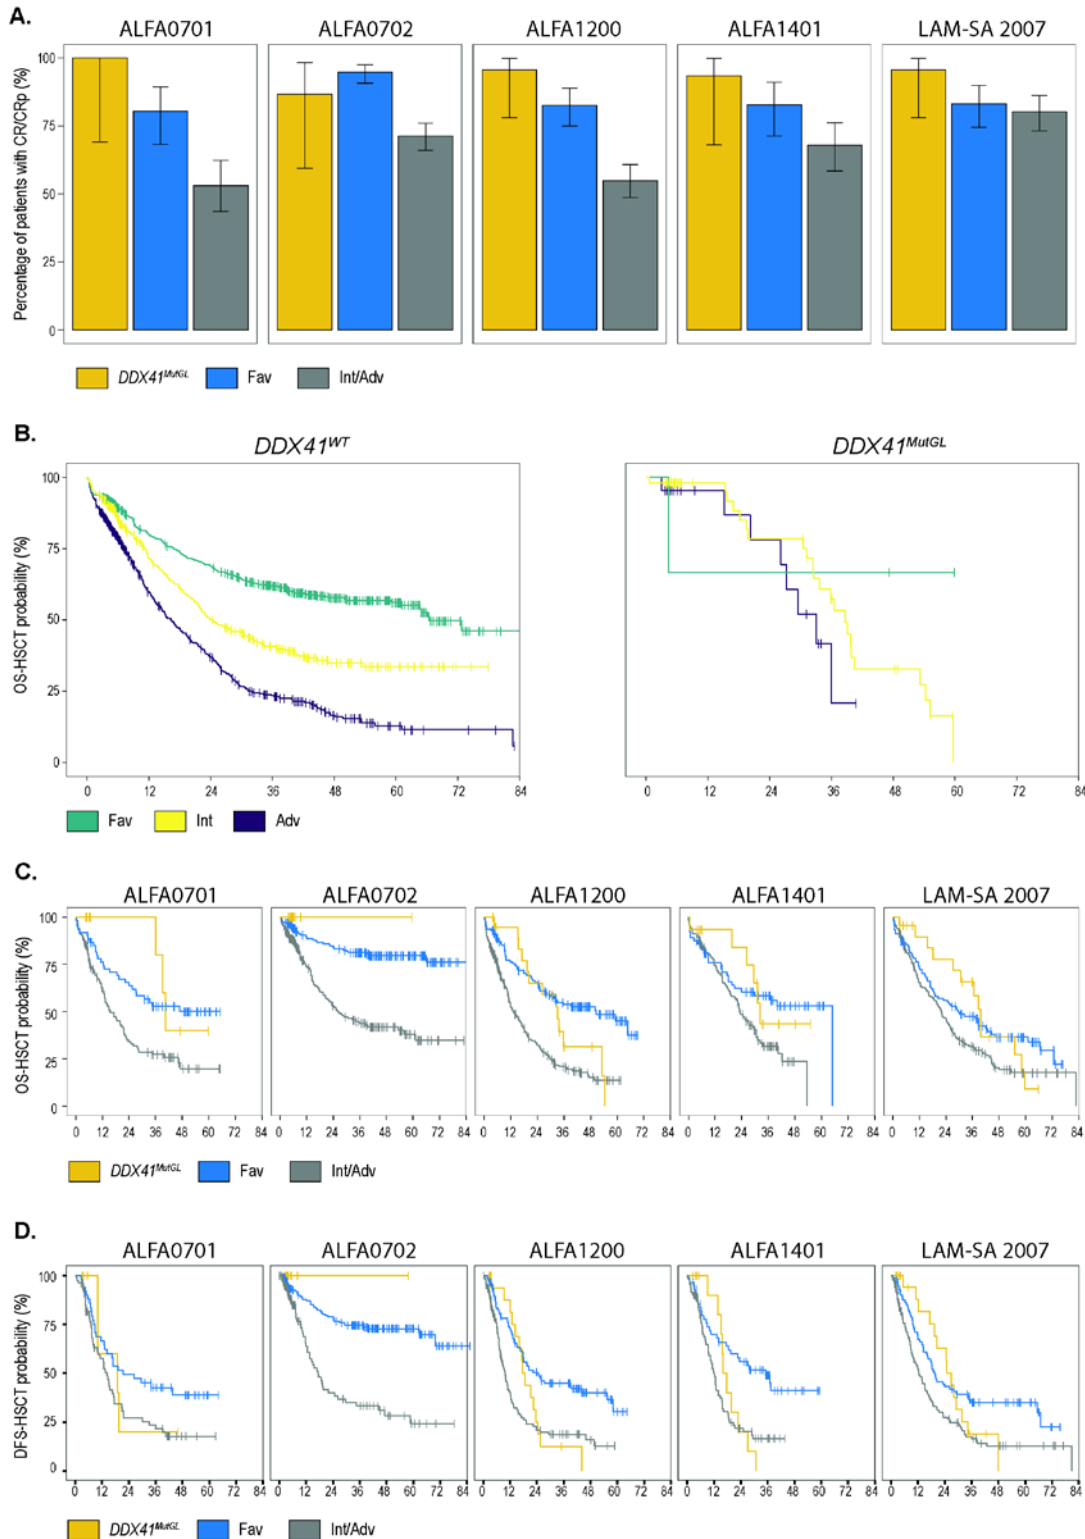



**Supplemental figure 4: Scaled Schoenfeld residuals plot versus time for the Cox proportional hazards model**

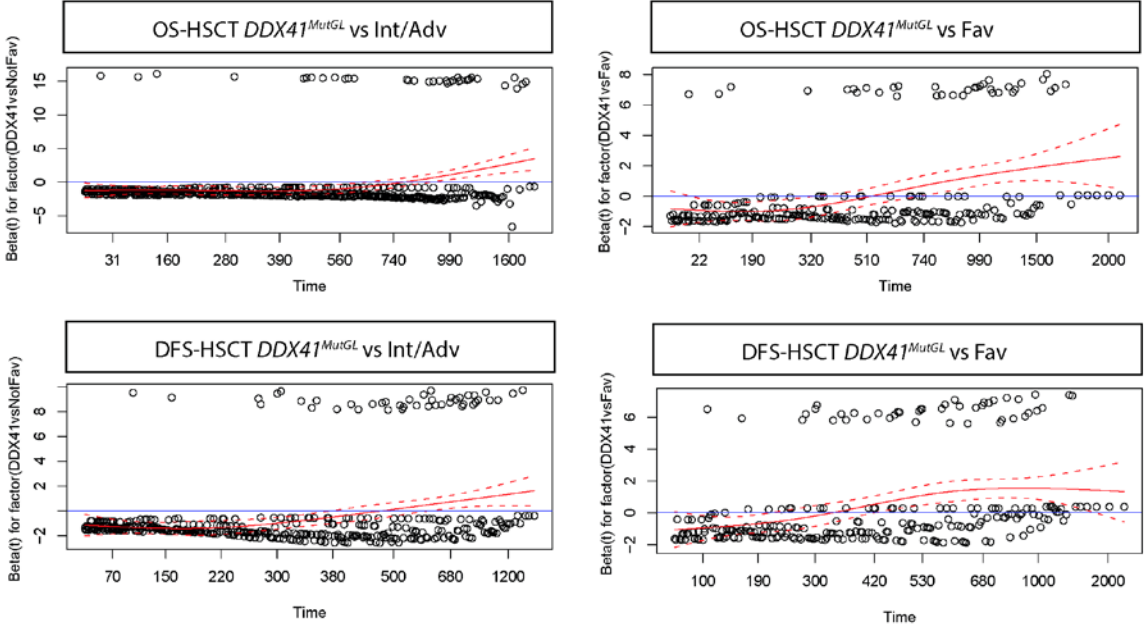

**Supplemental figure 5: Fishplots visualizing patterns of clonal evolution in relapse patients as inferred by CALDER algorithm.**

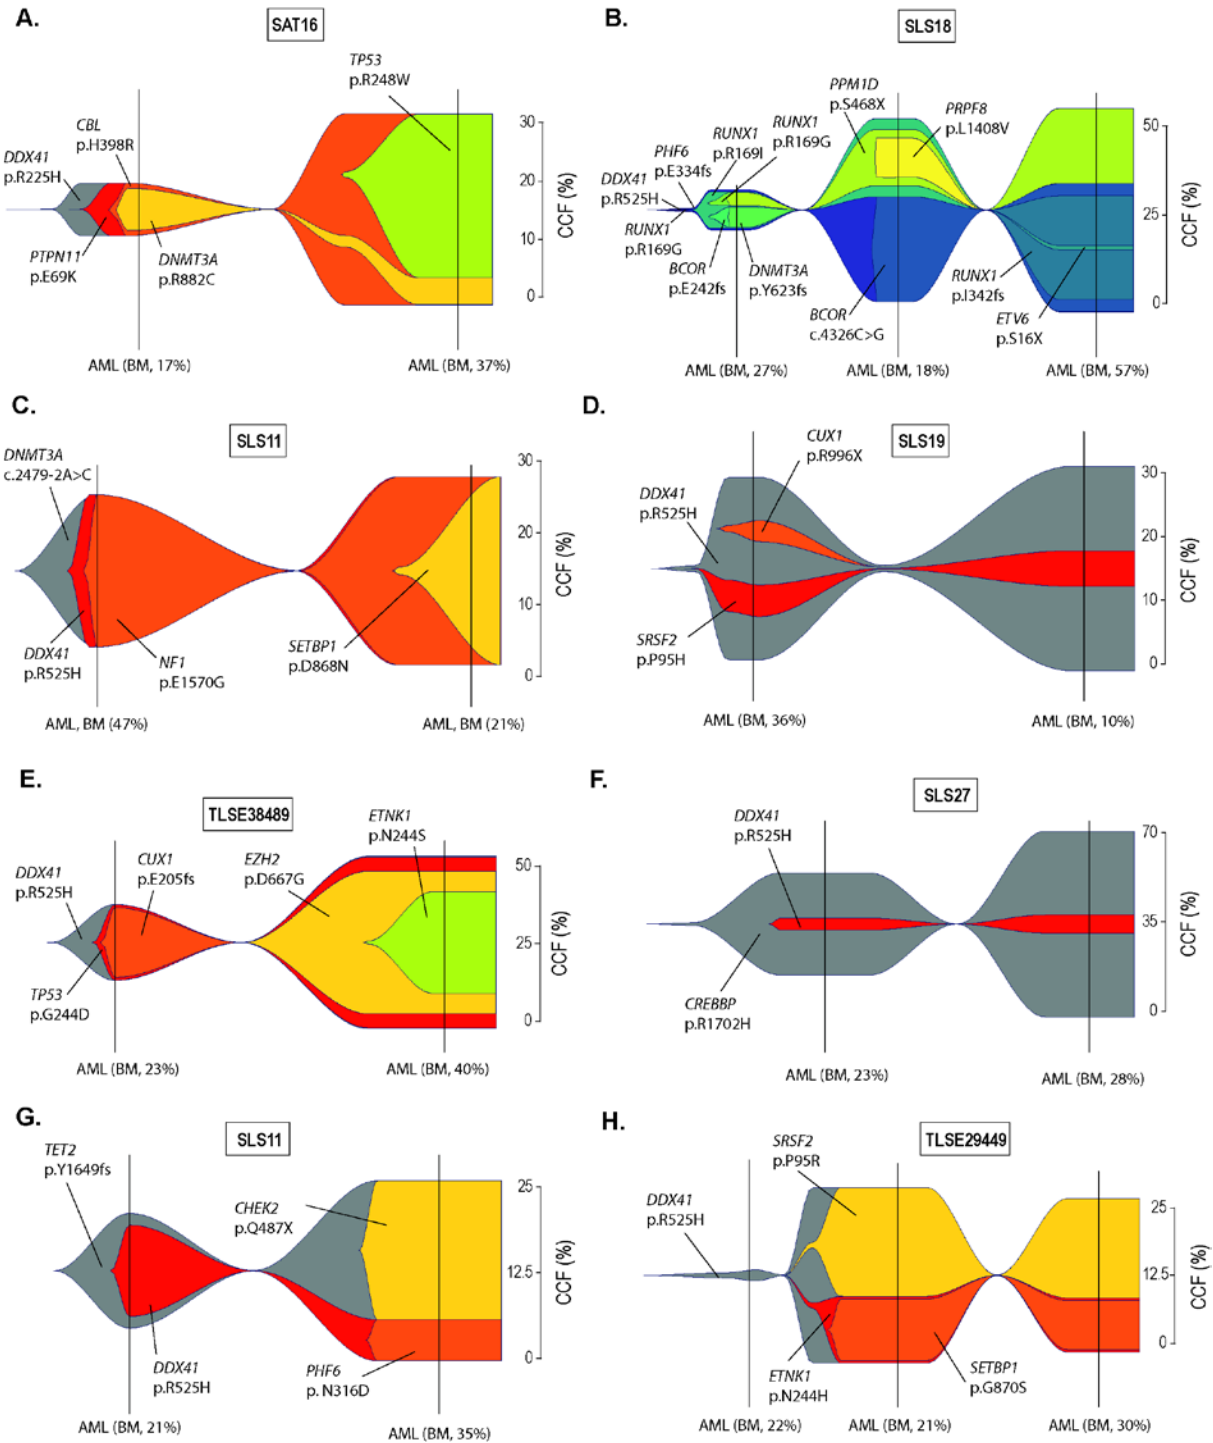

## References

1. Quesada AE, Routbort MJ, DiNardo CD, et al. DDX41 mutations in myeloid neoplasms are associated with male gender, TP53 mutations and high-risk disease. *American Journal of Hematology*. 2019;94(7):757–766.
2. Yang F, Long N, Anekpuritanang T, et al. Identification and prioritization of myeloid malignancy germline variants in a large cohort of adult AML patients. *Blood*. 2021;(blood.2021011354):
3. Largeaud L, Cornillet-Lefebvre P, Hamel J-F, et al. Lomustine is beneficial to older AML with ELN2017 adverse risk profile and intermediate karyotype: a FILO study. *Leukemia*. 2021;35(5):1291–1300.
4. Sébert M, Passet M, Raimbault A, et al. Germline DDX41 mutations define a significant entity within adult MDS/AML patients. *Blood*. 2019;134(17):1441–1444.
5. Lewinsohn M, Brown AL, Weinel LM, et al. Novel germ line DDX41 mutations define families with a lower age of MDS/AML onset and lymphoid malignancies. *Blood*. 2016;127(8):1017–1023.
6. Polprasert C, Schulze I, Sekeres MA, et al. Inherited and Somatic Defects in DDX41 in Myeloid Neoplasms. *Cancer Cell*. 2015;27(5):658–670.
7. Bannon SA, Routbort MJ, Montalban-Bravo G, et al. Next-Generation Sequencing of DDX41 in Myeloid Neoplasms Leads to Increased Detection of Germline Alterations. *Front. Oncol*. 2021;10:.
8. Abou Dalle I, Kantarjian H, Bannon SA, et al. Successful lenalidomide treatment in high risk myelodysplastic syndrome with germline DDX41 mutation. *Am J Hematol*. 2020;95(2):227–229.
9. Goyal T, Tu ZJ, Wang Z, Cook JR. Clinical and Pathologic Spectrum of DDX41-Mutated Hematolymphoid Neoplasms. *American Journal of Clinical Pathology*. 2021;(aqab027):.
10. Qu S, Li B, Qin T, et al. Molecular and clinical features of myeloid neoplasms with somatic DDX41 mutations. *Br J Haematol*. 2020;
11. Berger G, van den Berg E, Sikkema-Raddatz B, et al. Re-emergence of acute myeloid leukemia in donor cells following allogeneic transplantation in a family with a germline DDX41 mutation. *Leukemia*. 2017;31(2):520–522.
12. Cardoso SR, Ryan G, Walne AJ, et al. Germline heterozygous DDX41 variants in a subset of familial myelodysplasia and acute myeloid leukemia. *Leukemia*. 2016;30(10):2083–2086.
13. Rio-Machin A, Vulliamy T, Hug N, et al. The complex genetic landscape of familial MDS and AML reveals pathogenic germline variants. *Nat Commun*. 2020;11(1):1–12.
14. Alkhateeb HB, Nanaa A, Viswanatha DS, et al. Genetic features and clinical outcomes of patients with isolated and comutated *DDX41* -mutated myeloid neoplasms. *Blood Advances*. 2021;bloodadvances.2021005738.
15. Takeda J, Yoshida K, Makishima H, et al. Genetic Predispositions to Myeloid Neoplasms Caused By Germline DDX41 Mutations. *Blood*. 2015;126(23):2843–2843.
16. Li P, White T, Xie W, et al. AML with germline DDX41 variants is a clinicopathologically distinct entity with an indolent clinical course and favorable outcome. *Leukemia*. 2021;1–11.
